# Supplementary material
Source: Springer Nature journal article supplement (https://www.springermedizin.de/resource/supplementary/12876_2013_1070_MOESM1_ESM.pdf/9438388)

634 FDR of 186  
biopsy-proven  
celiac patients\*

450 FDR agreed  
to take part in the  
project (Group I)

19 new biopsy-  
proven cases of  
CD

205 FDR retrieved  
and re-tested  
(Group II)\*\*

8 FDR seroconverted  
and 5 biopsy-proven

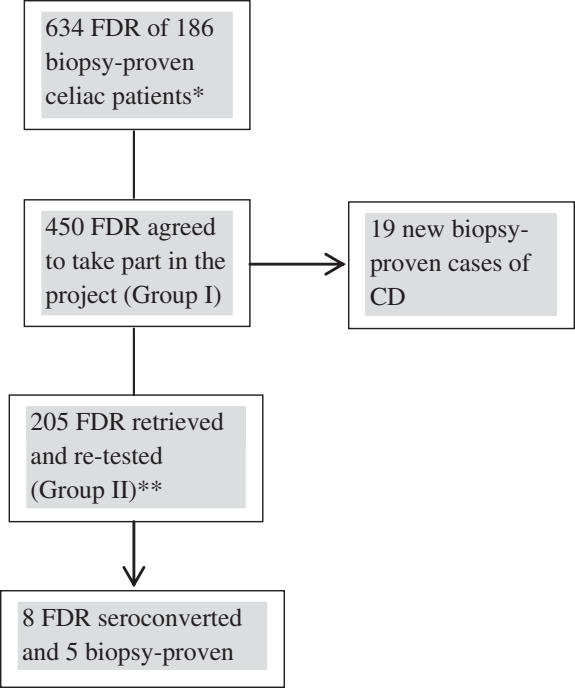

Supplement: MOESM1 [file 9438388]
